# Supplementary material
Source: publisher figshare collection journal article supplement (https://gsapubs.figshare.com/ndownloader/files/22743689)

Appendix Figure DR1. Additional examples of cold-based erosion features. A: Type 2 abrasion. Variably shaped, individual unweathered abrasion marks on Beacon sandstone. Floor of one abrasion (arrow) is coated with pulverized sandstone remnants of abrading tool. Ice flow was from top to bottom. Hammer is 33 cm long. B: Type 4 abrasion. Ridge-and-Groove lineations on thin carbonaceous layers in Beacon strata. Surfaces have a sheen similar to slickensides. Ice movement was from top to bottom.

Appendix Figure DR2. Additional examples of cold-based deposition features. A: Type 2 deposition. Isolated Boulders on Beacon platforms in central Allan Hills. Note the person for scale by boulder in foreground and 3 meter high boulder on ridge in middle distance (arrow). This ridge is about 75 m above and 1200 m inland from the present Manhaul Bay Glacier margin. View looking east. Ice-flow was from left to right. B: Type 3 deposition. Ice-cored debris cones up to 3 m high and 7 m diameter on Beacon platforms near the Manhaul Bay Glacier margin. The ice-cored cone is completely covered by loose Beacon debris. Manhaul Bay Glacier in background. Note person for scale, lower left (arrow).

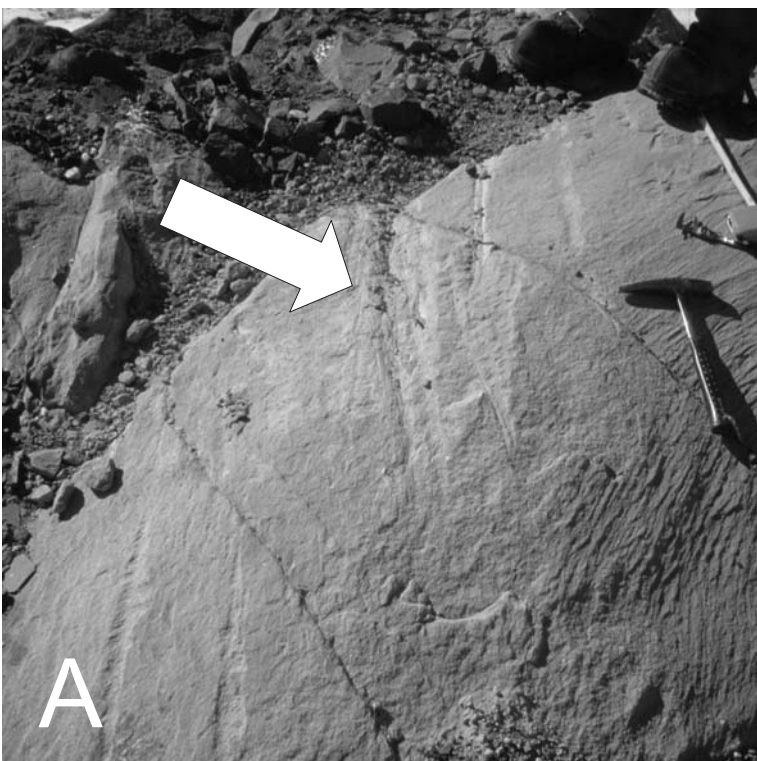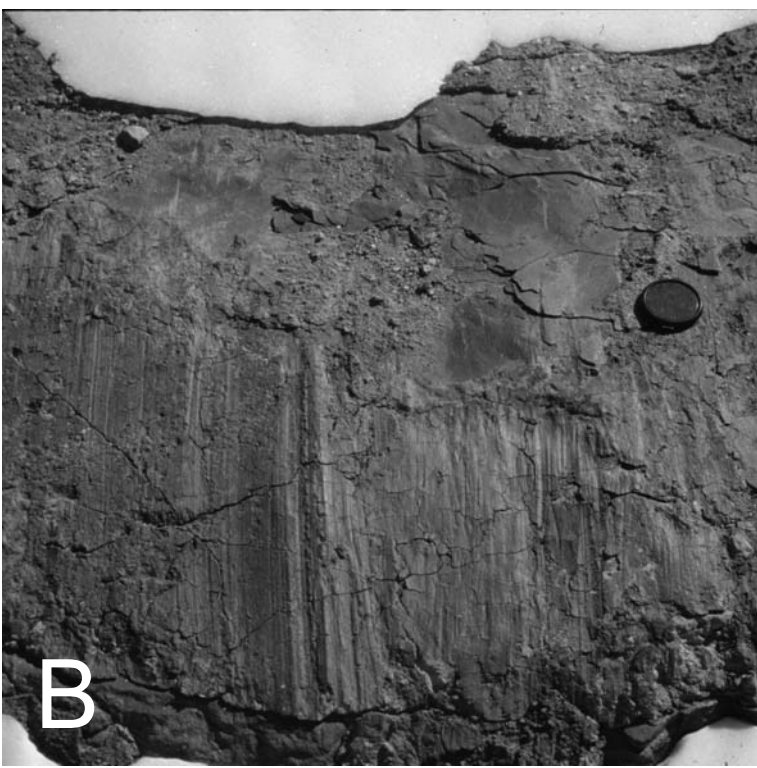

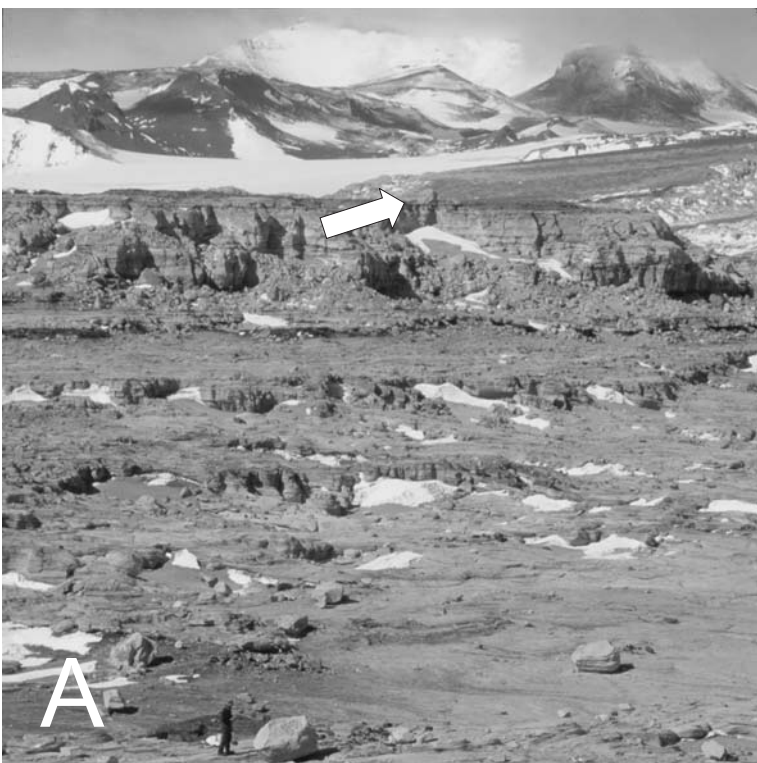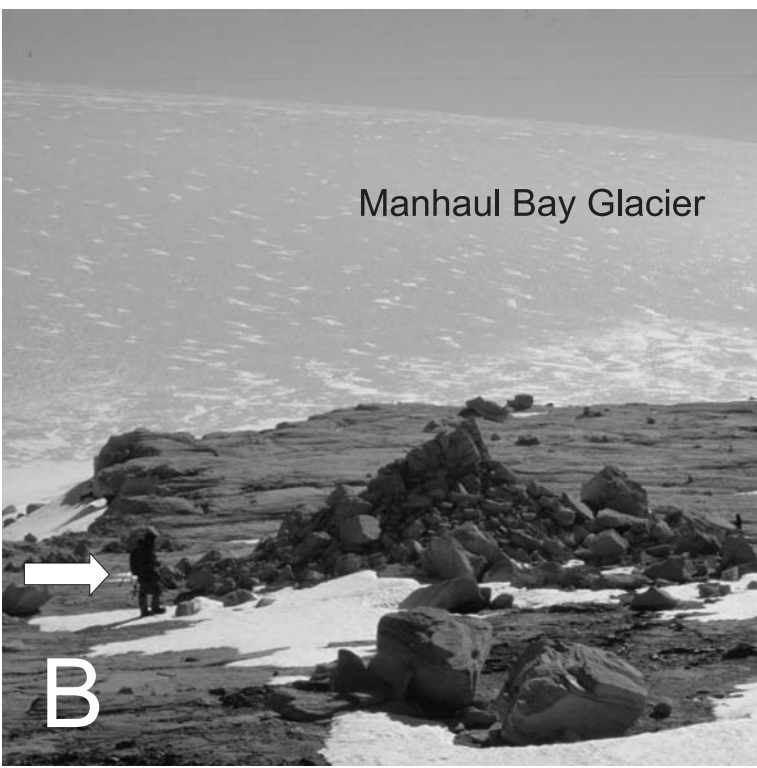

Supplement: Supplementary file 1 [file 22743689]
